# Supplementary material for: Reactive adsorption of low concentration methyl mercaptan on a Cu-based MOF with controllable size and shape
Source: Royal Society of Chemistry journal article supplement (doi:10.1039/c6ra18593b), 2016-01-01
Supplement: c6ra18593b1.pdf [file c6ra18593b1.pdf]

## Supporting information

### **Reactive adsorption of low concentration methyl mercaptan on Cu-based MOF with controllable size and shape**

Xiang Ma,<sup>ab</sup> Haidi Liu,<sup>a</sup> Weiman Li,<sup>ab</sup> Shengpan Peng,<sup>ab</sup> and Yunfa Chen <sup>\*a</sup>

<sup>a</sup> State Key Laboratory of Multiphase Complex System, Institute of Process Engineering, Chinese Academy of Sciences, Beijing, 100190, China.

<sup>b</sup> University of Chinese Academy of Sciences, No. 19A Yuquan Road, Beijing, 100049, China.

Corresponding author Email: [yfchen@ipe.ac.cn](mailto:yfchen@ipe.ac.cn) Tel: 86-10-8254 4896

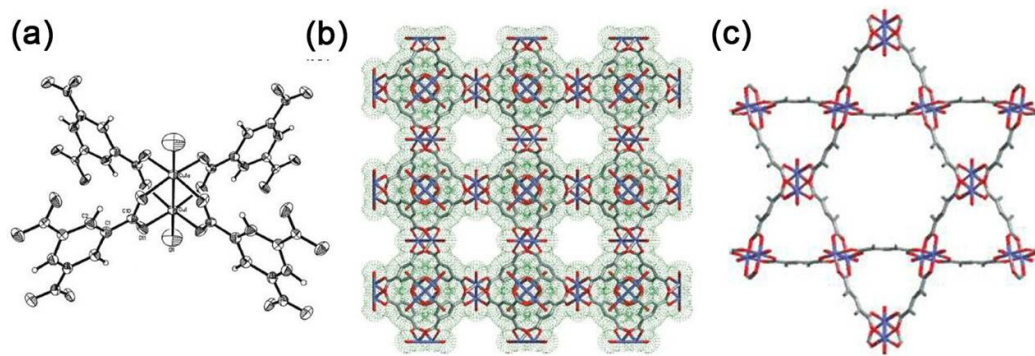

**Figure S1.** (a) Dicopper tetracarboxylate building block of HKUST-1. (b) HKUST-1 polymer framework viewed down the (1 0 0) direction. (c) HKUST-1 viewed along the cell body diagonal (1 1 1).

MOF-199 is a well-known Cu-based MOF material first reported by Chui et al. [1]. The structure of MOF-199 is as follows. The polymer forms face-centered-cubic crystals that contain an intersecting three-dimensional system of large square-shaped pore (9 Å by 9 Å). The pores themselves contain up to 10 additional water molecules per formula unit. A view down the (1 0 0) direction of the cubic cell of HKUST-1 reveals about 1 nm size channels with fourfold symmetry. A view through the cell body diagonal (1 1 1) reveals a honeycomb arrangement of large hexagonal-shaped windows, each composed of a ring of six metal dimers and six trimesate groups, which measure 18.6 Å between opposite vertices. The windows are cross sections of the “cavities” formed at the intersection of the three orthogonal sets of channels.

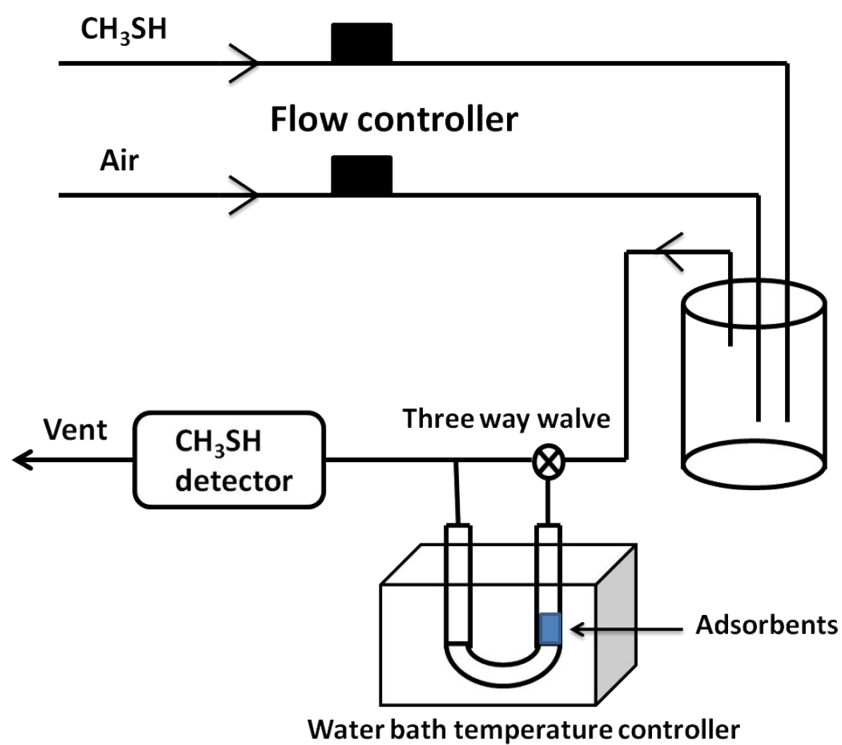

**Figure S2.** The adsorption system for gaseous  $\text{CH}_3\text{SH}$ .

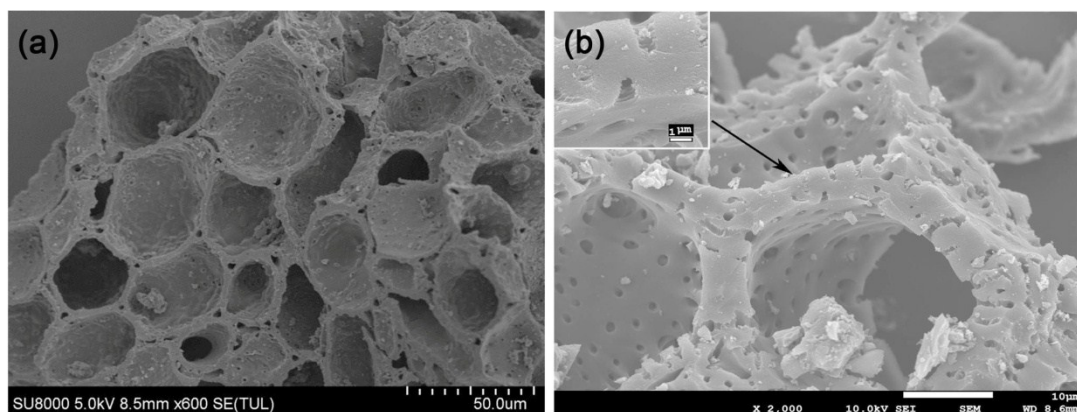

**Figure S3.** SEM image of (a) commercialized AC and (b) Cu-0.7.

**Table S1.** Comparison of BET surface area between MOF-199 in our work and previously reported work.

| Ref. | Activation temperature (°C) | BET surface area (m <sup>2</sup> /g) |
|------|-----------------------------|--------------------------------------|
| our  | 70                          | 903.9, 684.5, 580.7                  |
| our  | 150                         | 960.4, 729.8, 631.1                  |
| [2]  | 170                         | 1264                                 |
| [3]  | 85                          | 857, 1482                            |
| [4]  | 120                         | 1040                                 |
| [5]  | 120                         | 909                                  |
| [6]  | 150                         | 940                                  |
| [7]  | 170                         | 1507                                 |

We also measured the BET surface area activating at 150 °C and BET surface area of L O, S O, and sphere like MOF-199 is 960 m<sup>2</sup>/g, 729 m<sup>2</sup>/g and 631 m<sup>2</sup>/g, respectively.

The BET surface area activated at 150 °C is little higher than that of 70 °C which proves that the activation temperature at 70 °C is enough to activate the synthesized MOF-199. The room temperature synthesis of MOF-199 has even lower BET surface area because of the partial inclusion of PVP [8], interconnected MOF networks [9], or the existence of nanocrystalline domains [10].

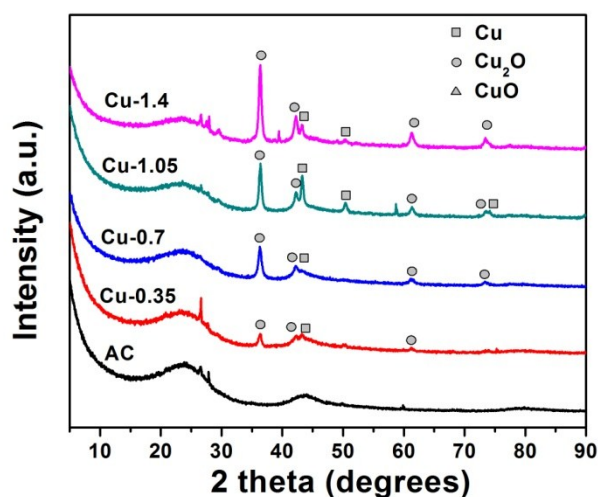

Figure S4. XRD patterns of AC and Cu loaded AC with different loading amount.

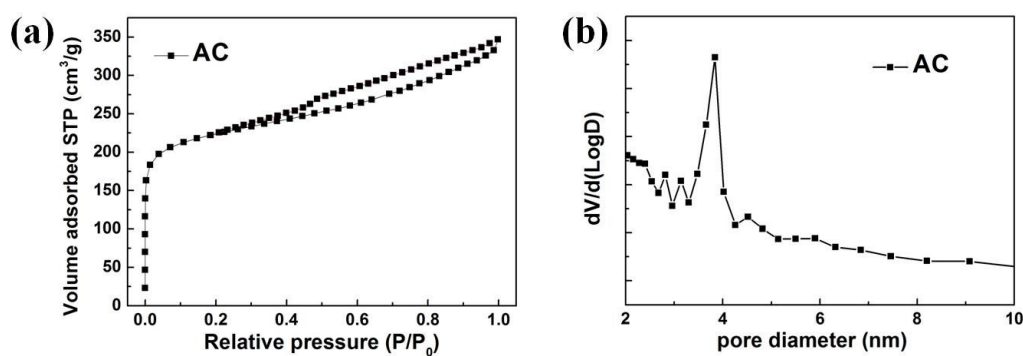

Figure S5. (a)  $N_2$  adsorption-desorption and (b) pore size distributions of commercialized AC.

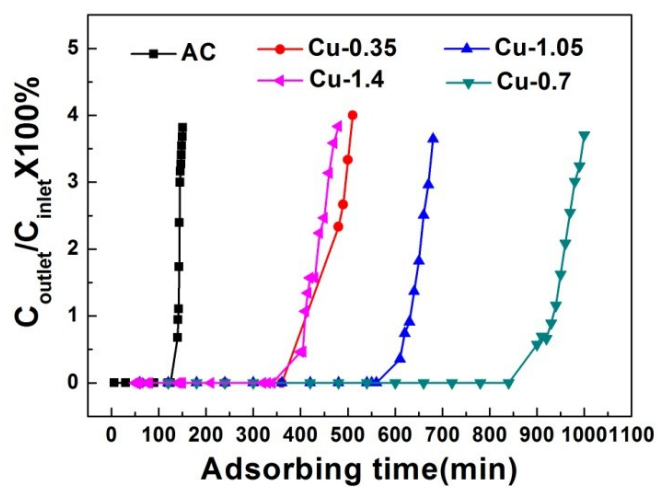

Figure S6.  $CH_3SH$  breakthrough curves for different loading amount of Cu on AC.

**Preparation of Cu loaded AC.** Certain amount of copper nitrate trihydrate was dissolved in ethanol and 10 g of AC was added in the solution with continuous stirring. After stirring for 8 h, the ethanol was removed by heating the solution. The modified AC was then dried at 80 °C for 5 h. Then the dry Cu loaded AC was placed in a tube furnace, heated to 300 °C with a ramping rate of 5 °C min<sup>-1</sup> and maintained for 4 h in nitrogen. At last, the temperature was decreased to 25 °C. The Cu loaded AC was labelled as Cu-x, and x represent the loading amount of Cu (mmol/g AC)

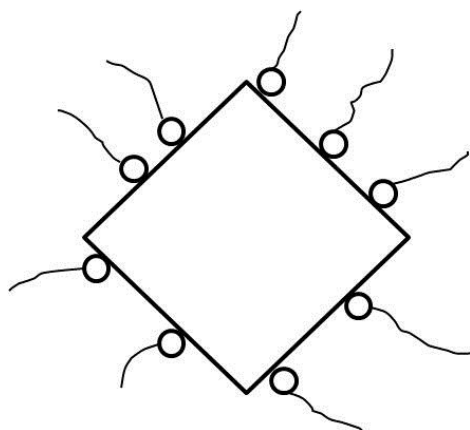

**Figure S7.** Illustration of the remaining PVP on the surface of S O MOF-199.

The remaining PVP attached on the surface of S O MOF-199 can reduce the surface energy of S O MOF-199 and alter the coordination equilibrium at the crystal surface during the growth process in the synthesis. However, the remaining PVP occupy the surface sites of S O MOF-199 resulting to steric hindrance. Therefore, The CH<sub>3</sub>SH molecule is more difficult to get access to the open metal Cu in MOF-199 leading to bad performance in the breakthrough experiment.

**Table S2.** Summary of sulfur compound capacity of L O and previously reported work.

| Sample                | Sulfur compound                  | Sulfur compound capacity<br>(mg/g adsorbent) | Ref. |
|-----------------------|----------------------------------|----------------------------------------------|------|
| HKUST-1               | CH <sub>3</sub> SH               | 74.7                                         | Our  |
| HKUST-1               | SO <sub>2</sub>                  | 32                                           | [11] |
| HKUST-1 with<br>GOPSN | H <sub>2</sub> S                 | 109                                          | [12] |
| HKUST-1 with<br>GOSA  | H <sub>2</sub> S                 | 133                                          |      |
| HKUST-1               | C <sub>2</sub> H <sub>5</sub> SH | 18.3                                         | [13] |
|                       | CH <sub>3</sub> SCH <sub>3</sub> | 24.4                                         |      |
| HKUST-1               | dibenzothiophene                 | 45                                           | [14] |
| Cu-BTC                | t-butylmercaptan                 | 300                                          | [15] |

**Table S3.** Assignment of XPS peaks of fresh and exhausted L O MOF-199 materials

| Species       | Cu 2p <sub>3/2</sub> | S 2p                                        |                                             |
|---------------|----------------------|---------------------------------------------|---------------------------------------------|
| Fresh L O     | 935.1 eV Cu-O        | —                                           |                                             |
| Exhausted L O | 935.1 eV Cu-O        | 168.3 eV methyl thiolate                    |                                             |
|               |                      | 162.0 eV 2p <sub>3/2</sub><br>sulfur anions | 162.6 eV 2p <sub>1/2</sub><br>sulfur anions |
|               | 933.2 eV CuS         | 163.4 eV 2p <sub>3/2</sub><br>CuS           | 164.3 eV 2p <sub>1/2</sub><br>CuS           |
|               |                      |                                             |                                             |

## Reference

- [1] S. S.-Y. Chui, S. M.-F. Lo, J. P. H. Charmant, A. G. Orpen and L. D. Williams, *Science*, 1999, 283, 1148-1150.
- [2] D. Britt, D. Tranchemontagne and O M. Yaghi, *PNAS*, 2008, 105, 11623-11627.
- [3] P. Chowdhury, C. Bikkina, D. Deister, F. Dreisbach and S. Gumma, *Microporous and Mesoporous Materials*, 2009, 117, 406-413.
- [4] A. M. Ebrahim, J. Jagiello and T. J. Bandoz, *J. Mater. Chem. A.*, 2015, 3, 8194-8204.

- [5] C. Petit, B. Levasseur, B. Mendoza and T. J. Bandoza, *Microporous and Mesoporous Materials*, 2012, 154, 107-112.
- [6] O. Fleker, A. Borentein, R. Lavi, L. Benisvy, S. Ruthstein and D. Aurbach, *Langmuir*, 2016, 32, 4935-4944.
- [7] L. C. Rowsell and O. M. Yaghi, *J. Am. Chem. Soc.*, 2006, 128, 1304-1315.
- [8] G. W. Zhan and H. C. Zeng, *Chem. Commun.*, 2016, 52, 8432-8435.
- [9] L. Qiu, T. Xu, Z. Li, W. Wang, Y. Wu, X. Jiang, X. Tian, and L. D. Zhang, *Angew. Chem. Ind. Ed.*, 2008, 47, 9487-9491
- [10] J. Cravillon, S. Münzer, S. J. Lohmeier, A. Feldhoff, K. Huber and M. Wiebcke, *Chem. Mater.*, 2009, 21, 1410-1412.
- [11] D. Britt, D. Tranchemontagne and O M. Yaghi, *PNAS*, 2008, 105, 11623-11627.
- [12] A. M. Ebrahim, J. Jagiello and T. J. Bandoz, *J. Mater. Chem. A.*, 2015, 3, 8194-8204.
- [13] Y. Li, L. J. Wang, H. L. Fan, J. Shangguan, H. Wang and J. Mi, *Energy Fuels*, 2015, 29, 298-304.
- [14] G. B. Brieva, J. M. C. Martin, S. M. A. Zahrani and J. L. G. Fierro, *Fuel*, 2011, 90, 190-197.
- [15] G. Chen, S. Tan, W. J. Koros and C. W. Jones, *Energy Fuels*, 2015, 29, 3312-3321.
